# Supplementary material for: Eco-friendly TEMPO/laccase/O2 biocatalytic system for degradation of Indigo Carmine: operative conditions and laccase inactivation
Source: Royal Society of Chemistry journal article supplement (doi:10.1039/d3ra03107a), 2023-01-01
Supplement: d3ra03107a1.pdf [file d3ra03107a1.pdf]

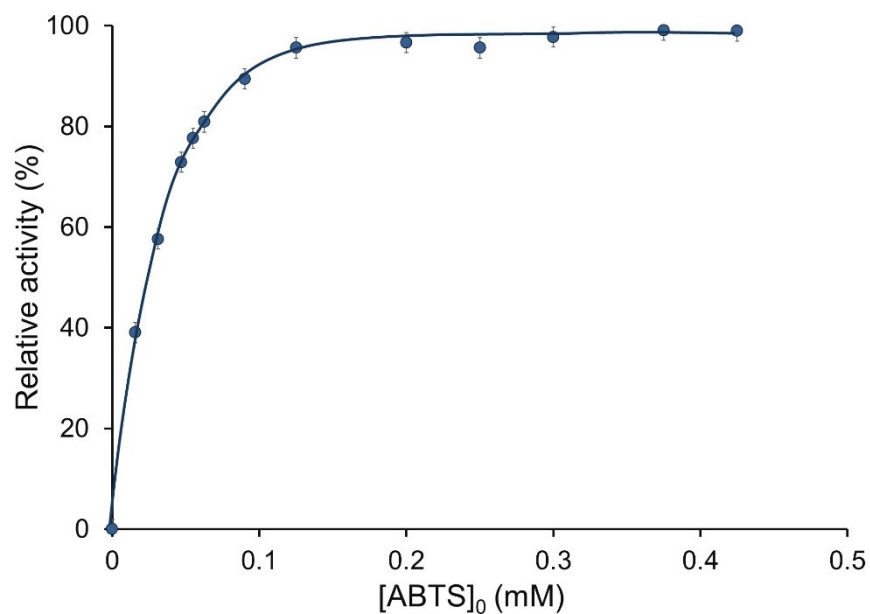

**Fig. S1.** Effect of ABTS concentration on the *T. versicolor* laccase relative activity at  $[\text{laccase}]_0 = 6.0 \cdot 10^{-3} \text{ U} \cdot \text{mL}^{-1}$  in the citrate-phosphate buffer at pH 4.5 at 35 °C

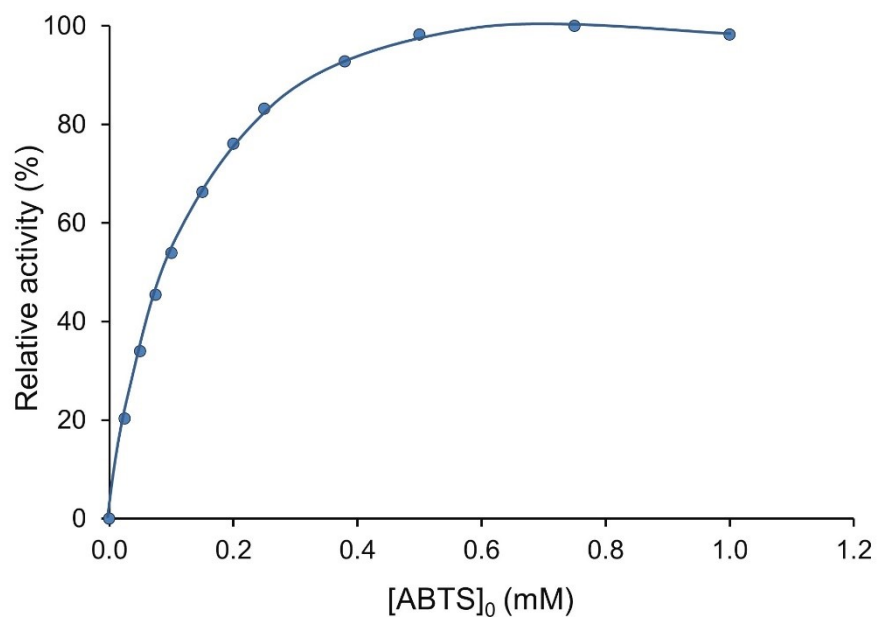

**Fig. S2.** Effect of ABTS concentration on the *T. versicolor* laccase relative activity at  $[\text{laccase}]_0 = 0.12 \text{ U} \cdot \text{mL}^{-1}$  in the citrate-phosphate buffer at pH 4.5 at 35 °C

**Table S1**

The effect of initial TEMPO concentration and time on laccase relative activity.  $[\text{laccase}]_0 = 0.12 \text{ U}\cdot\text{mL}^{-1}$  in the citrate-phosphate buffer at pH 4.5 at 35 °C

| <i>t</i> , hour | [TEMPO] <sub>0</sub> , mM |       |      |       |      |      |       |      |
|-----------------|---------------------------|-------|------|-------|------|------|-------|------|
|                 | 0                         | 0.1   | 0.3  | 0.5   | 0.8  | 1.0  | 1.3   | 1.5  |
|                 | Relative activity, %      |       |      |       |      |      |       |      |
| 0.0             | 100.00                    | 100.0 | 92.7 | 93.2  | 96.4 | 83.9 | 87.0  | 90.1 |
| 3.0             | 117.10                    | 94.3  | 87.5 | 101.0 | 99.0 | 98.4 | 104.2 | 94.3 |
| 6.0             | 110.81                    | 90.6  | 91.1 | 94.3  | 88.5 | 84.4 | 82.3  | 79.7 |
| 9.0             | 106.45                    | 83.9  | 88.0 | 81.8  | 83.9 | 84.4 | 79.7  | 71.9 |
| 12.0            | 99.68                     | 85.4  | 83.9 | 84.9  | 82.3 | 83.9 | 75.5  | 69.3 |
| 24.0            | 85.97                     | 59.4  | 56.8 | 56.3  | 51.0 | 47.9 | 41.7  | 34.4 |
| 36.0            | 77.26                     | 47.9  | 44.3 | 42.7  | 36.5 | 34.9 | 27.1  | 25.0 |
| 48.0            | 65.5                      | 32.3  | 27.1 | 28.6  | 21.4 | 19.3 | 12.5  | 12.0 |
| 60.0            | 56.0                      | 26.0  | 20.3 | 21.4  | 15.1 | 13.5 | 7.8   | 6.3  |
| 72.0            | 45.2                      | 19.8  | 14.6 | 14.1  | 9.9  | 7.3  | 3.6   | 2.6  |
| 84.0            | 37.6                      | 15.6  | 10.4 | 10.9  | 6.8  | 5.2  | 2.6   | 2.1  |
| 96.0            | 31.6                      | 13.0  | 7.8  | 8.3   | 4.2  | 3.1  | 2.6   | 0.0  |

**Table S2**

The effect of initial TEMPO and CuSO<sub>4</sub> concentrations and time on laccase relative activity. [laccase]<sub>0</sub> = 0.12 U·mL<sup>-1</sup>, [TEMPO]<sub>0</sub> = 0.5 mM in the citrate-phosphate buffer at pH 4.5 at 35 °C

| <i>t</i> , hour | [CuSO <sub>4</sub> ] <sub>0</sub> , mM |       |       |       |       |
|-----------------|----------------------------------------|-------|-------|-------|-------|
|                 | 0                                      | 0.5   | 1     | 5     | 10    |
|                 | Relative activity, %                   |       |       |       |       |
| 0.0             | 100.0                                  | 106.8 | 108.2 | 104.9 | 100.2 |
| 3.0             | 117.1                                  | 110.9 | 114.7 | 101.2 | 89.6  |
| 6.0             | 110.8                                  | 99.7  | 101.1 | 93.6  | 80.9  |
| 9.0             | 106.5                                  | 87.9  | 92.6  | 84.2  | 70.6  |
| 12.0            | 99.7                                   | 78.5  | 82.3  | 72.4  | 63.1  |
| 24.0            | 86.0                                   | 59.8  | 64.5  | 56.1  | 46.3  |
| 36.0            | 77.3                                   | 50.0  | 49.3  | 44.3  | 36.8  |
| 48.0            | 65.5                                   | 38.2  | 36.8  | 33.6  | 28.0  |
| 60.0            | 53.7                                   | 30.3  | 30.3  | 27.7  | 22.9  |
| 72.0            | 45.2                                   | 25.4  | 26.3  | 23.2  | 19.1  |

**Table S3**

The effect of initial TEMPO and Cu(NO<sub>3</sub>)<sub>2</sub> concentrations and time on laccase relative activity. [laccase]<sub>0</sub> = 0.12 U·mL<sup>-1</sup>, [TEMPO]<sub>0</sub> = 0.5 mM in the citrate-phosphate buffer at pH 4.5 at 35 °C

| <i>t</i> , hour | [Cu(NO <sub>3</sub> ) <sub>2</sub> ] <sub>0</sub> , mM |      |       |      |      |
|-----------------|--------------------------------------------------------|------|-------|------|------|
|                 | 0                                                      | 0.5  | 1     | 5    | 10   |
|                 | Relative activity, %                                   |      |       |      |      |
| 0.0             | 100.0                                                  | 98.5 | 105.9 | 86.1 | 85.1 |
| 3.0             | 117.1                                                  | 93.6 | 102.5 | 82.2 | 90.1 |
| 6.0             | 110.8                                                  | 81.2 | 86.1  | 69.8 | 69.3 |
| 9.0             | 106.5                                                  | 69.8 | 75.7  | 60.4 | 55.0 |
| 12.0            | 99.7                                                   | 61.9 | 65.8  | 54.5 | 42.6 |
| 24.0            | 86.0                                                   | 41.1 | 47.5  | 38.1 | 24.3 |
| 36.0            | 77.3                                                   | 30.2 | 31.2  | 26.2 | 17.8 |
| 48.0            | 65.5                                                   | 21.3 | 23.3  | 19.8 | 11.4 |
| 60.0            | 56.0                                                   | 14.9 | 16.8  | 13.9 | 8.4  |
| 72.0            | 45.2                                                   | 10.4 | 9.9   | 9.4  | 5.9  |

**Table S4**

The effect of initial  $\text{Cu}(\text{NO}_3)_2$  concentration and time on laccase relative activity.  $[\text{laccase}]_0 = 0.12 \text{ U}\cdot\text{mL}^{-1}$  in the citrate-phosphate buffer at pH 4.5 at 35 °C

| <i>t</i> , hour | $[\text{Cu}(\text{NO}_3)_2]_0$ , mM |       |       |       |       |
|-----------------|-------------------------------------|-------|-------|-------|-------|
|                 | 0                                   | 0.5   | 1     | 5     | 10    |
|                 | Relative activity, %                |       |       |       |       |
| 0.0             | 100.00                              | 106.5 | 115.8 | 119.8 | 123.4 |
| 3.0             | 117.10                              | 117.9 | 122.1 | 125.5 | 122.6 |
| 6.0             | 110.81                              | 110.3 | 111.0 | 110.6 | 104.4 |
| 9.0             | 106.45                              | 100.5 | 107.7 | 102.9 | 93.1  |
| 12.0            | 99.68                               | 99.0  | 100.6 | 97.4  | 81.5  |
| 24.0            | 85.97                               | 77.7  | 81.0  | 73.5  | 55.5  |
| 36.0            | 77.26                               | 64.2  | 68.5  | 59.2  | 42.6  |
| 48.0            | 65.5                                | 48.2  | 57.1  | 42.4  | 29.0  |
| 60.0            | 55.8                                | 33.9  | 45.0  | 27.3  | 15.9  |
| 72.0            | 45.2                                | 36.1  | 38.9  | 18.9  | 11.9  |

**Table S5**

The effect of initial  $\text{CuSO}_4$  concentration and time on laccase relative activity.  $[\text{laccase}]_0 = 0.12 \text{ U}\cdot\text{mL}^{-1}$  in the citrate-phosphate buffer at pH 4.5 at 35 °C

| <i>t</i> , hour | $[\text{CuSO}_4]_0$ , mM |       |       |       |       |
|-----------------|--------------------------|-------|-------|-------|-------|
|                 | 0                        | 0.5   | 1     | 5     | 10    |
|                 | Relative activity, %     |       |       |       |       |
| 0.0             | 100.0                    | 96.5  | 102.1 | 110.1 | 113.7 |
| 3.0             | 117.1                    | 116.5 | 114.7 | 114.6 | 117.9 |
| 6.0             | 110.8                    | 109.5 | 106.5 | 98.5  | 103.6 |
| 9.0             | 106.5                    | 106.2 | 105.9 | 93.1  | 91.1  |
| 12.0            | 99.7                     | 97.4  | 98.7  | 85.8  | 82.3  |
| 24.0            | 86.0                     | 83.2  | 86.6  | 72.2  | 63.5  |
| 36.0            | 77.3                     | 77.2  | 80.5  | 58.1  | 54.8  |
| 48.0            | 65.5                     | 63.0  | 69.8  | 47.7  | 45.5  |
| 60.0            | 53.7                     | 52.6  | 65.6  | 43.0  | 42.7  |
| 72.0            | 45.2                     | 45.1  | 59.8  | 31.0  | 28.8  |

**Table S6**

The effect of initial  $\text{CuCl}_2$  concentration and time on laccase relative activity.  $[\text{laccase}]_0 = 0.12 \text{ U}\cdot\text{mL}^{-1}$  in the citrate-phosphate buffer at pH 4.5 at 35 °C

| t, hour | $[\text{CuCl}_2]_0$ , mM |       |       |       |       |      |
|---------|--------------------------|-------|-------|-------|-------|------|
|         | 0                        | 0.5   | 1     | 5     | 10    | 50   |
|         | Relative activity, %     |       |       |       |       |      |
| 0.0     | 100.0                    | 87.0  | 81.1  | 96.1  | 102.6 | 45.2 |
| 3.0     | 117.2                    | 128.0 | 117.5 | 129.5 | 132.3 | 24.6 |
| 6.0     | 116.2                    | 126.1 | 118.2 | 129.3 | 129.0 | 16.1 |
| 9.0     | 116.4                    | 121.6 | 114.9 | 121.1 | 119.8 | 10.3 |
| 12.0    | 111.0                    | 117.9 | 111.8 | 120.0 | 113.3 | 9.7  |
| 24.0    | 80.0                     | 89.0  | 89.5  | 123.0 | 105.7 | 9.1  |
| 36.0    | 72.8                     | 80.2  | 80.5  | 125.2 | 100.8 | 7.5  |
| 48.0    | 60.3                     | 68.7  | 68.5  | 120.3 | 99.8  | 3.3  |
| 60.0    | 47.9                     | 63.9  | 60.2  | 114.1 | 102.5 | 2.3  |
| 72.0    | 40.0                     | 58.7  | 73.1  | 107.9 | 101.0 | 0.5  |

**Table S7**

The effect of initial TEMPO and  $\text{CuCl}_2$  concentrations and time on laccase relative activity.  $[\text{laccase}]_0 = 0.12 \text{ U}\cdot\text{mL}^{-1}$ ,  $[\text{TEMPO}]_0 = 0.5 \text{ mM}$  in the citrate-phosphate buffer at pH 4.5 at 35 °C

| t, hour | $[\text{CuCl}_2]_0$ , mM |       |       |       |       |       |
|---------|--------------------------|-------|-------|-------|-------|-------|
|         | 0                        | 0.5   | 1     | 5     | 10    | 50    |
|         | Relative activity, %     |       |       |       |       |       |
| 0.0     | 100.0                    | 83.8  | 93.8  | 99.4  | 105.3 | 90.6  |
| 3.0     | 105.9                    | 120.6 | 121.3 | 121.9 | 125.9 | 103.8 |
| 6.0     | 112.8                    | 123.1 | 121.6 | 129.7 | 131.6 | 102.6 |
| 9.0     | 111.0                    | 106.6 | 111.9 | 103.4 | 120.6 | 100.0 |
| 12.0    | 109.1                    | 101.3 | 107.2 | 100.9 | 110.3 | 97.5  |
| 24.0    | 103.1                    | 83.4  | 100.3 | 105.6 | 114.1 | 92.5  |
| 36.0    | 97.5                     | 67.8  | 95.0  | 95.9  | 103.4 | 85.3  |
| 48.0    | 74.4                     | 41.3  | 74.7  | 76.3  | 78.4  | 66.6  |
| 60.0    | 65.9                     | 30.0  | 60.6  | 60.9  | 67.8  | 55.6  |
| 72.0    | 51.6                     | 20.0  | 45.3  | 40.9  | 55.0  | 47.5  |

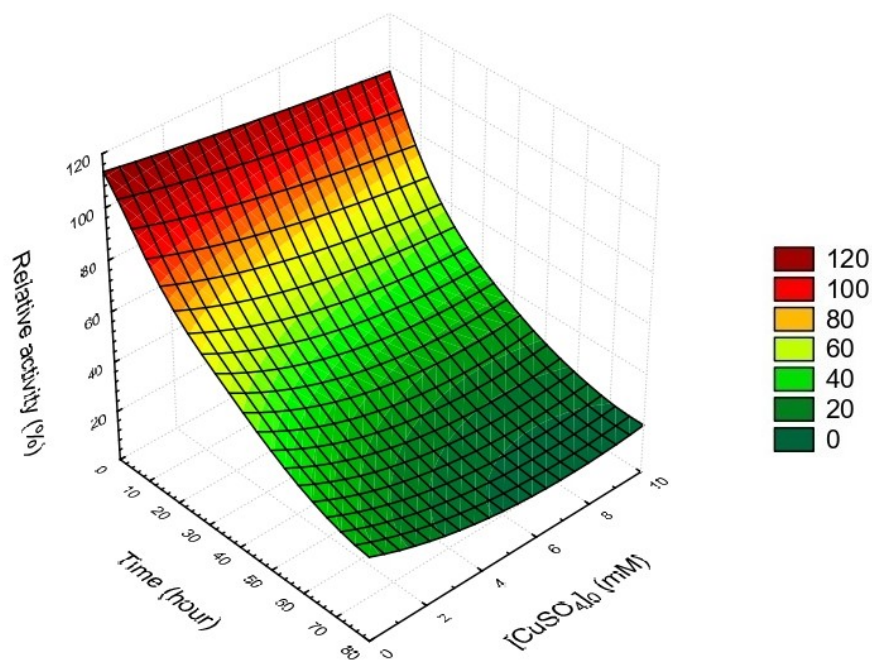

**Fig. S3.** 3D surface plot of the effect of initial TEMPO and  $\text{CuSO}_4$  concentrations and time on laccase relative activity.  $[\text{laccase}]_0 = 0.12 \text{ U} \cdot \text{mL}^{-1}$ ,  $[\text{TEMPO}]_0 = 0.5 \text{ mM}$  in the citrate-phosphate buffer at pH 4.5 at  $35 \text{ }^\circ\text{C}$

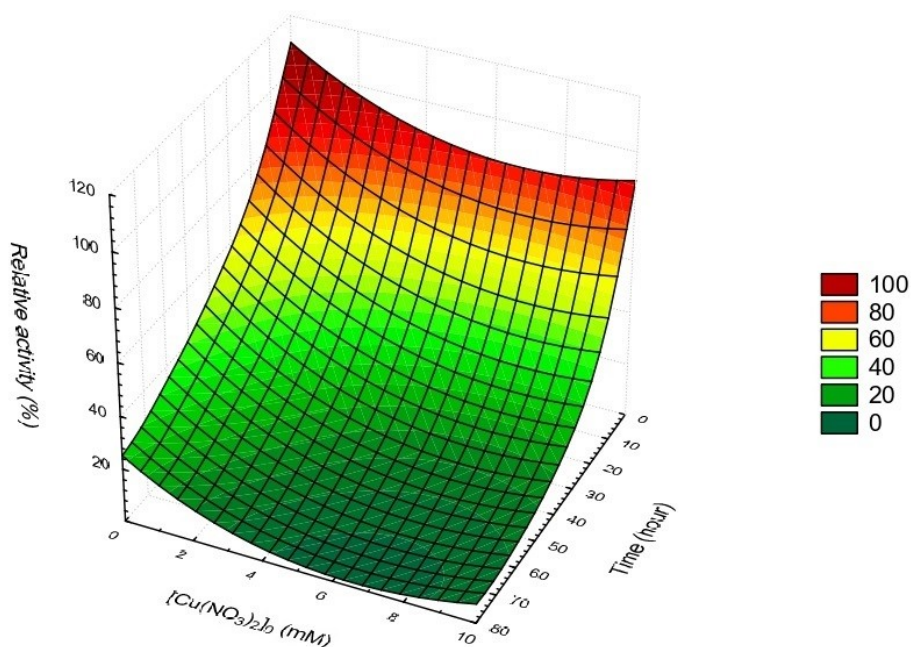

**Fig. S4.** 3D surface plot of the effect of initial TEMPO and  $\text{Cu}(\text{NO}_3)_2$  concentrations and time on laccase relative activity.  $[\text{laccase}]_0 = 0.12 \text{ U} \cdot \text{mL}^{-1}$ ,  $[\text{TEMPO}]_0 = 0.5 \text{ mM}$  in the citrate-phosphate buffer at pH 4.5 at  $35 \text{ }^\circ\text{C}$



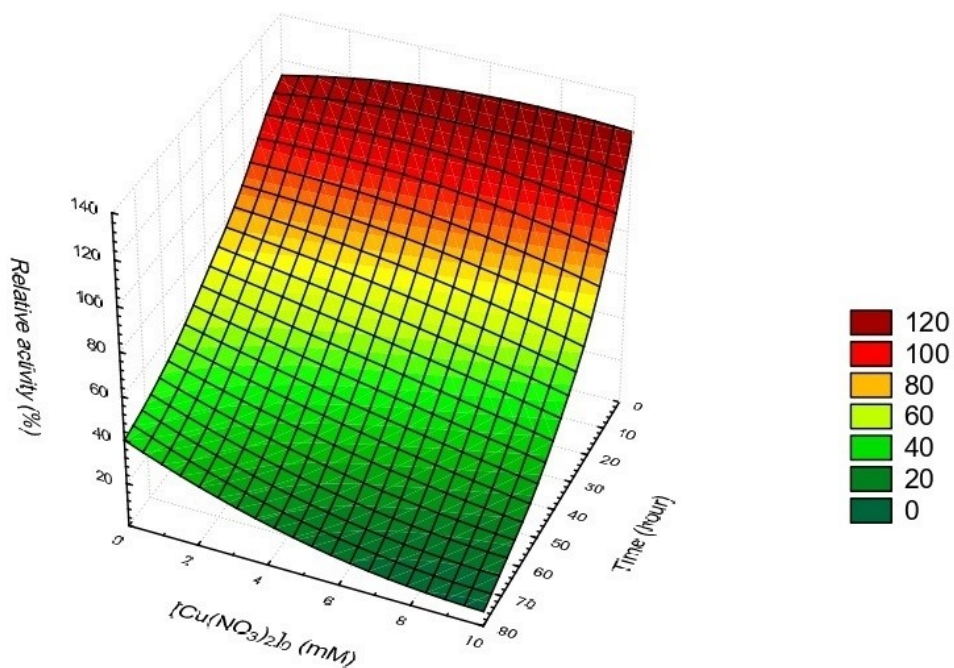

**Fig. S5.** 3D surface plot of the effect of initial  $\text{Cu}(\text{NO}_3)_2$  concentration and time on laccase relative activity.  $[\text{laccase}]_0 = 0.12 \text{ U} \cdot \text{mL}^{-1}$  in the citrate-phosphate buffer at pH 4.5 at 35 °C

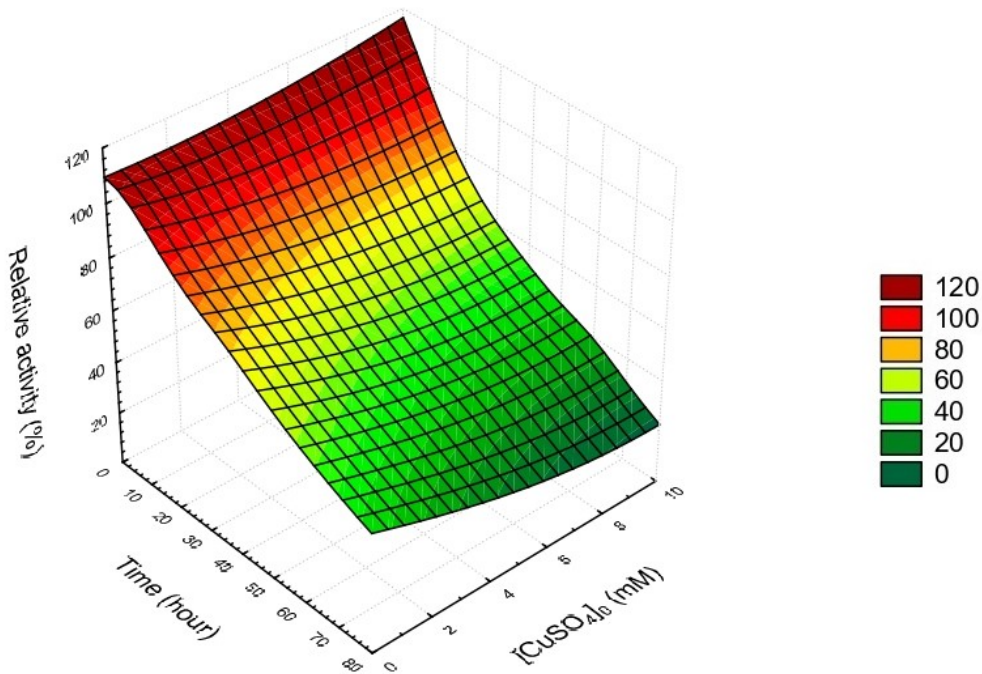

**Fig. S6.** 3D surface plot of the effect of initial  $\text{CuSO}_4$  concentration and time on laccase relative activity.  $[\text{laccase}]_0 = 0.12 \text{ U} \cdot \text{mL}^{-1}$  in the citrate-phosphate buffer at pH 4.5 at 35 °C



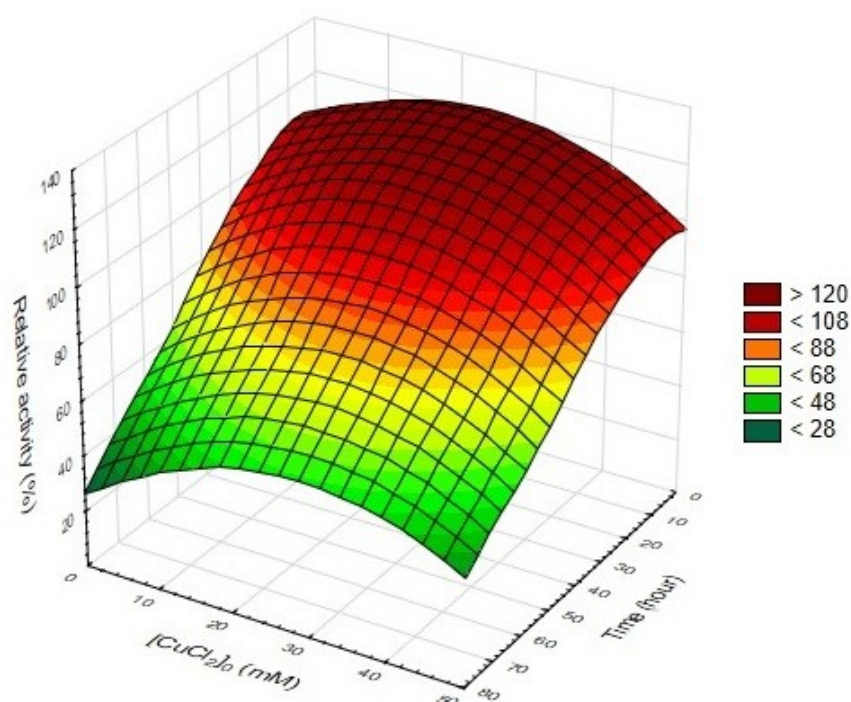

**Fig. S7.** 3D surface plot of the effect of initial TEMPO and  $\text{CuCl}_2$  concentrations and time on laccase relative activity.  $[\text{laccase}]_0 = 0.12 \text{ U} \cdot \text{mL}^{-1}$ ,  $[\text{TEMPO}]_0 = 0.5 \text{ mM}$  in the citrate-phosphate buffer at pH 4.5 at  $35 \text{ }^\circ\text{C}$

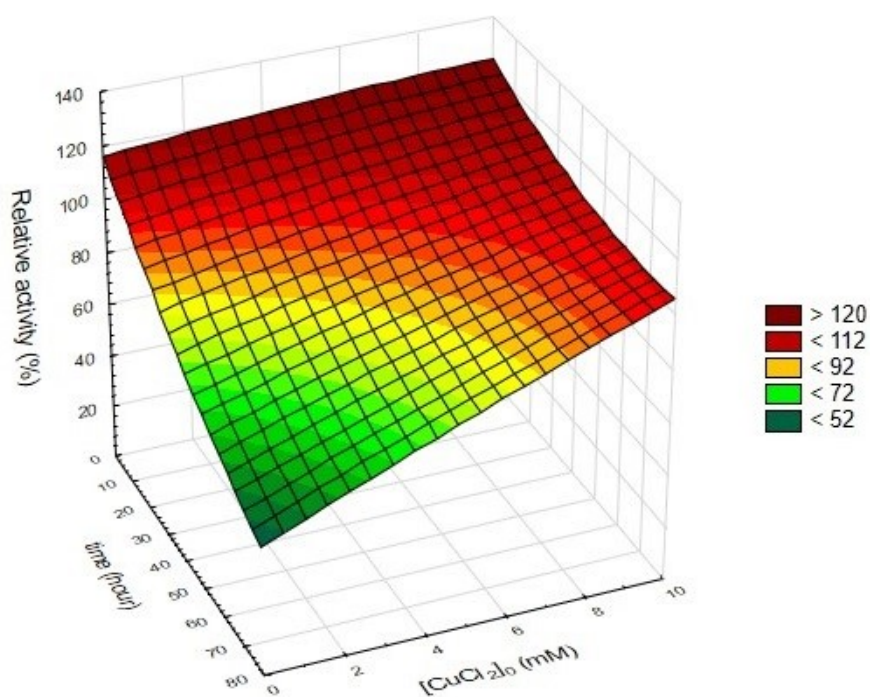

**Fig. S8.** 3D surface plot of the effect of initial  $\text{CuCl}_2$  concentration and time on laccase relative activity.  $[\text{laccase}]_0 = 0.12 \text{ U} \cdot \text{mL}^{-1}$  in the citrate-phosphate buffer at pH 4.5 at  $35 \text{ }^\circ\text{C}$
